# Supplementary material for: Design Features and Rationale of the BEAR-MOON (Bridge-Enhanced ACL Restoration Multicenter Orthopaedic Outcomes Network) Randomized Clinical Trial
Source: PubMed Central journal article supplement — Orthop J Sports Med. 2022 Jan 25;10(1):23259671211065447. doi: 10.1177/23259671211065447 (PMC8793429; doi:10.1177/23259671211065447), 2022-01-25
Supplement: sj-pdf-1-ojs-10.1177_23259671211065447.pdf [file sj-pdf-1-ojs-10.1177_23259671211065447.pdf]

**Potential conflicts of interest or sources of funding:**

The study was funded by NIH grant R01 AR074131 and utilized resources from K23 AR066133 (principal investigator: M.H.J.) and NIAMS grants U01AR071658, 1R01AR055557, and R21AR076156. The contents are solely the responsibility of the authors and do not necessarily represent official views of the National Center for Advancing Translational Sciences, the National Institute of Arthritis and Musculoskeletal and Skin Disease, or the National Institutes of Health (NIH). Braces used in the ongoing BEAR-MOON study were provided by DonJoy Orthopaedics.

One or more of the Cleveland Clinic leaders have an equity interest and serve on the board of directors of a company that makes products used in this study. They may benefit financially if this research is successful. These financial interests are being managed and are within permissible limits established by the local institutional conflict of interest policy. If you have any questions regarding conflict of interests, please contact the corresponding author.

*BEAR-MOON Members:* K.P.S. has received research support from DonJoy Orthopaedics and Smith & Nephew Endoscopy; consulting fees from Flexion Therapeutics, National Football League, and Novoped; and royalties from Oberd. P.D.F. has received education payments from Arthrex. L.F. has received research support from the Orthopaedic Research and Education Foundation. D.F. has received education payments from CDC Medical and Zimmer; consulting fees from Aastrom, Ceterix, ConMed Linvatec, DePuy Mitek, Hyalex, KCRN Research, Moximed, MTF, Smith & Nephew, Vericel, and Zimmer; nonconsulting fees from Linvatec, Smith & Nephew, and Vericel; and honoraria from Vericel. B.C.F. has received education payments from Smith & Nephew, consulting fees from New York R&D Center for Translational Medicine and Therapeutics, royalties from Springer, is a cofounder of Miach Orthopaedics, and is a paid associate editor for *The American Journal of Sports Medicine*. M.J.H. has received education payments from Arthrex. C.K. has received grant support from DJO, education payments from CDC Medical, consulting fees from Zimmer, and nonconsulting fees from Arthrex and Smith & Nephew. R.M. has received research support from Arthrex and Zimmer and education payments from CDC Medical. B.D.O. has received consulting fees from DePuy, Linvatec, Miach, MTF, Rotation Medical, and Vericel; honoraria from Vericel; royalties from ConMed Linvatec; has stock/stock options in Vivorte; and is a paid associate editor for *The American Journal of Sports Medicine*. P.S. has received education payments from Rock Medical; consulting fees from Arthrex, DJO, and DePuy; nonconsulting fees from Arthrex; and hospitality payments from MTF. M.S. has received education payments and nonconsulting fees from Arthrex. G.S. has received royalties from Oberd. C.S.W. has received consulting fees from Siemens Medical.
